# Supplementary material for: Evaluation of black carbon emission inventories using a Lagrangian dispersion model – a case study over southern India
Source: Copernicus journal article supplement (doi:10.5194/acp-15-1447-2015), 2015-02-10
Supplement: Supplementary file 1 [file acp-15-1447-2015-supplement-cover-letter.pdf › acp-15-1447-2015-supplement-cover-letter.pdf]

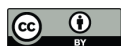

## *Supplement of*

# **Evaluation of black carbon emission inventories using a Lagrangian dispersion model – a case study over southern India**

**H. S. Gadhavi et al.**

*Correspondence to:* H. S. Gadhavi (harish.gadhavi@gmail.com, harish@narl.gov.in)

- acp-15-1447-2015-supplement-cover-letter.pdf
- supporting\_material
  - 0README.txt
  - absorption\_alpha\_2009.png
  - fire\_hotspot\_map\_annual\_average\_2009.png
  - fire\_hotspot\_map\_autumn\_2009.png
  - fire\_hotspot\_map\_spring\_2009.png
  - fire\_hotspot\_map\_summer\_2009.png
  - fire\_hotspot\_map\_winter\_2009.png
  - map\_india\_with\_statenames.tif
  - pes\_maps
    - \* 0README.txt
    - \* nowet\_BC\_fp\_20090101.png
    - \* nowet\_BC\_fp\_20090102.png
    - \* nowet\_BC\_fp\_20090103.png
    - \* nowet\_BC\_fp\_20090104.png
    - \* nowet\_BC\_fp\_20090105.png
    - \* nowet\_BC\_fp\_20090106.png
    - \* nowet\_BC\_fp\_20090107.png
    - \* nowet\_BC\_fp\_20090108.png
    - \* nowet\_BC\_fp\_20090109.png
    - \* nowet\_BC\_fp\_20090110.png
    - \* nowet\_BC\_fp\_20090111.png
    - \* nowet\_BC\_fp\_20090112.png
    - \* nowet\_BC\_fp\_20090113.png
    - \* nowet\_BC\_fp\_20090114.png

\* nowet\_BC\_fp\_20090115.png  
\* nowet\_BC\_fp\_20090116.png  
\* nowet\_BC\_fp\_20090117.png  
\* nowet\_BC\_fp\_20090118.png  
\* nowet\_BC\_fp\_20090119.png  
\* nowet\_BC\_fp\_20090120.png  
\* nowet\_BC\_fp\_20090121.png  
\* nowet\_BC\_fp\_20090122.png  
\* nowet\_BC\_fp\_20090123.png  
\* nowet\_BC\_fp\_20090124.png  
\* nowet\_BC\_fp\_20090125.png  
\* nowet\_BC\_fp\_20090126.png  
\* nowet\_BC\_fp\_20090127.png  
\* nowet\_BC\_fp\_20090128.png  
\* nowet\_BC\_fp\_20090129.png  
\* nowet\_BC\_fp\_20090130.png  
\* nowet\_BC\_fp\_20090131.png  
\* nowet\_BC\_fp\_20090201.png  
\* nowet\_BC\_fp\_20090202.png  
\* nowet\_BC\_fp\_20090203.png  
\* nowet\_BC\_fp\_20090204.png  
\* nowet\_BC\_fp\_20090205.png  
\* nowet\_BC\_fp\_20090206.png  
\* nowet\_BC\_fp\_20090207.png  
\* nowet\_BC\_fp\_20090208.png  
\* nowet\_BC\_fp\_20090209.png  
\* nowet\_BC\_fp\_20090210.png  
\* nowet\_BC\_fp\_20090211.png  
\* nowet\_BC\_fp\_20090212.png  
\* nowet\_BC\_fp\_20090213.png  
\* nowet\_BC\_fp\_20090214.png  
\* nowet\_BC\_fp\_20090215.png  
\* nowet\_BC\_fp\_20090216.png  
\* nowet\_BC\_fp\_20090217.png  
\* nowet\_BC\_fp\_20090218.png  
\* nowet\_BC\_fp\_20090219.png  
\* nowet\_BC\_fp\_20090220.png  
\* nowet\_BC\_fp\_20090221.png  
\* nowet\_BC\_fp\_20090222.png  
\* nowet\_BC\_fp\_20090223.png  
\* nowet\_BC\_fp\_20090224.png  
\* nowet\_BC\_fp\_20090225.png  
\* nowet\_BC\_fp\_20090226.png  
\* nowet\_BC\_fp\_20090227.png  
\* nowet\_BC\_fp\_20090228.png  
\* nowet\_BC\_fp\_20090301.png  
\* nowet\_BC\_fp\_20090302.png

\* nowet\_BC\_fp\_20090303.png  
\* nowet\_BC\_fp\_20090304.png  
\* nowet\_BC\_fp\_20090305.png  
\* nowet\_BC\_fp\_20090306.png  
\* nowet\_BC\_fp\_20090307.png  
\* nowet\_BC\_fp\_20090308.png  
\* nowet\_BC\_fp\_20090309.png  
\* nowet\_BC\_fp\_20090310.png  
\* nowet\_BC\_fp\_20090311.png  
\* nowet\_BC\_fp\_20090312.png  
\* nowet\_BC\_fp\_20090313.png  
\* nowet\_BC\_fp\_20090314.png  
\* nowet\_BC\_fp\_20090315.png  
\* nowet\_BC\_fp\_20090316.png  
\* nowet\_BC\_fp\_20090317.png  
\* nowet\_BC\_fp\_20090318.png  
\* nowet\_BC\_fp\_20090319.png  
\* nowet\_BC\_fp\_20090320.png  
\* nowet\_BC\_fp\_20090321.png  
\* nowet\_BC\_fp\_20090322.png  
\* nowet\_BC\_fp\_20090323.png  
\* nowet\_BC\_fp\_20090324.png  
\* nowet\_BC\_fp\_20090325.png  
\* nowet\_BC\_fp\_20090326.png  
\* nowet\_BC\_fp\_20090327.png  
\* nowet\_BC\_fp\_20090328.png  
\* nowet\_BC\_fp\_20090329.png  
\* nowet\_BC\_fp\_20090330.png  
\* nowet\_BC\_fp\_20090331.png  
\* nowet\_BC\_fp\_20090401.png  
\* nowet\_BC\_fp\_20090402.png  
\* nowet\_BC\_fp\_20090403.png  
\* nowet\_BC\_fp\_20090404.png  
\* nowet\_BC\_fp\_20090405.png  
\* nowet\_BC\_fp\_20090406.png  
\* nowet\_BC\_fp\_20090407.png  
\* nowet\_BC\_fp\_20090408.png  
\* nowet\_BC\_fp\_20090409.png  
\* nowet\_BC\_fp\_20090410.png  
\* nowet\_BC\_fp\_20090411.png  
\* nowet\_BC\_fp\_20090412.png  
\* nowet\_BC\_fp\_20090413.png  
\* nowet\_BC\_fp\_20090414.png  
\* nowet\_BC\_fp\_20090415.png  
\* nowet\_BC\_fp\_20090416.png  
\* nowet\_BC\_fp\_20090417.png  
\* nowet\_BC\_fp\_20090418.png

- \* nowet\_BC\_fp\_20090419.png
- \* nowet\_BC\_fp\_20090420.png
- \* nowet\_BC\_fp\_20090421.png
- \* nowet\_BC\_fp\_20090422.png
- \* nowet\_BC\_fp\_20090423.png
- \* nowet\_BC\_fp\_20090424.png
- \* nowet\_BC\_fp\_20090425.png
- \* nowet\_BC\_fp\_20090426.png
- \* nowet\_BC\_fp\_20090427.png
- \* nowet\_BC\_fp\_20090428.png
- \* nowet\_BC\_fp\_20090429.png
- \* nowet\_BC\_fp\_20090430.png
- \* nowet\_BC\_fp\_20090501.png
- \* nowet\_BC\_fp\_20090502.png
- \* nowet\_BC\_fp\_20090503.png
- \* nowet\_BC\_fp\_20090504.png
- \* nowet\_BC\_fp\_20090505.png
- \* nowet\_BC\_fp\_20090506.png
- \* nowet\_BC\_fp\_20090507.png
- \* nowet\_BC\_fp\_20090508.png
- \* nowet\_BC\_fp\_20090509.png
- \* nowet\_BC\_fp\_20090510.png
- \* nowet\_BC\_fp\_20090511.png
- \* nowet\_BC\_fp\_20090512.png
- \* nowet\_BC\_fp\_20090513.png
- \* nowet\_BC\_fp\_20090514.png
- \* nowet\_BC\_fp\_20090515.png
- \* nowet\_BC\_fp\_20090516.png
- \* nowet\_BC\_fp\_20090517.png
- \* nowet\_BC\_fp\_20090518.png
- \* nowet\_BC\_fp\_20090519.png
- \* nowet\_BC\_fp\_20090520.png
- \* nowet\_BC\_fp\_20090521.png
- \* nowet\_BC\_fp\_20090522.png
- \* nowet\_BC\_fp\_20090523.png
- \* nowet\_BC\_fp\_20090524.png
- \* nowet\_BC\_fp\_20090525.png
- \* nowet\_BC\_fp\_20090526.png
- \* nowet\_BC\_fp\_20090527.png
- \* nowet\_BC\_fp\_20090528.png
- \* nowet\_BC\_fp\_20090529.png
- \* nowet\_BC\_fp\_20090530.png
- \* nowet\_BC\_fp\_20090531.png
- \* nowet\_BC\_fp\_20090601.png
- \* nowet\_BC\_fp\_20090602.png
- \* nowet\_BC\_fp\_20090603.png
- \* nowet\_BC\_fp\_20090604.png

- \* nowet\_BC\_fp\_20090605.png
- \* nowet\_BC\_fp\_20090606.png
- \* nowet\_BC\_fp\_20090607.png
- \* nowet\_BC\_fp\_20090608.png
- \* nowet\_BC\_fp\_20090609.png
- \* nowet\_BC\_fp\_20090610.png
- \* nowet\_BC\_fp\_20090611.png
- \* nowet\_BC\_fp\_20090612.png
- \* nowet\_BC\_fp\_20090613.png
- \* nowet\_BC\_fp\_20090614.png
- \* nowet\_BC\_fp\_20090615.png
- \* nowet\_BC\_fp\_20090616.png
- \* nowet\_BC\_fp\_20090617.png
- \* nowet\_BC\_fp\_20090618.png
- \* nowet\_BC\_fp\_20090619.png
- \* nowet\_BC\_fp\_20090620.png
- \* nowet\_BC\_fp\_20090621.png
- \* nowet\_BC\_fp\_20090622.png
- \* nowet\_BC\_fp\_20090623.png
- \* nowet\_BC\_fp\_20090624.png
- \* nowet\_BC\_fp\_20090625.png
- \* nowet\_BC\_fp\_20090626.png
- \* nowet\_BC\_fp\_20090627.png
- \* nowet\_BC\_fp\_20090628.png
- \* nowet\_BC\_fp\_20090629.png
- \* nowet\_BC\_fp\_20090630.png
- \* nowet\_BC\_fp\_20090701.png
- \* nowet\_BC\_fp\_20090702.png
- \* nowet\_BC\_fp\_20090703.png
- \* nowet\_BC\_fp\_20090704.png
- \* nowet\_BC\_fp\_20090705.png
- \* nowet\_BC\_fp\_20090706.png
- \* nowet\_BC\_fp\_20090707.png
- \* nowet\_BC\_fp\_20090708.png
- \* nowet\_BC\_fp\_20090709.png
- \* nowet\_BC\_fp\_20090710.png
- \* nowet\_BC\_fp\_20090711.png
- \* nowet\_BC\_fp\_20090712.png
- \* nowet\_BC\_fp\_20090713.png
- \* nowet\_BC\_fp\_20090714.png
- \* nowet\_BC\_fp\_20090715.png
- \* nowet\_BC\_fp\_20090716.png
- \* nowet\_BC\_fp\_20090717.png
- \* nowet\_BC\_fp\_20090718.png
- \* nowet\_BC\_fp\_20090719.png
- \* nowet\_BC\_fp\_20090720.png
- \* nowet\_BC\_fp\_20090721.png

\* nowet\_BC\_fp\_20090722.png  
\* nowet\_BC\_fp\_20090723.png  
\* nowet\_BC\_fp\_20090724.png  
\* nowet\_BC\_fp\_20090725.png  
\* nowet\_BC\_fp\_20090726.png  
\* nowet\_BC\_fp\_20090727.png  
\* nowet\_BC\_fp\_20090728.png  
\* nowet\_BC\_fp\_20090729.png  
\* nowet\_BC\_fp\_20090730.png  
\* nowet\_BC\_fp\_20090731.png  
\* nowet\_BC\_fp\_20090801.png  
\* nowet\_BC\_fp\_20090802.png  
\* nowet\_BC\_fp\_20090803.png  
\* nowet\_BC\_fp\_20090804.png  
\* nowet\_BC\_fp\_20090805.png  
\* nowet\_BC\_fp\_20090806.png  
\* nowet\_BC\_fp\_20090807.png  
\* nowet\_BC\_fp\_20090808.png  
\* nowet\_BC\_fp\_20090809.png  
\* nowet\_BC\_fp\_20090810.png  
\* nowet\_BC\_fp\_20090811.png  
\* nowet\_BC\_fp\_20090812.png  
\* nowet\_BC\_fp\_20090813.png  
\* nowet\_BC\_fp\_20090814.png  
\* nowet\_BC\_fp\_20090815.png  
\* nowet\_BC\_fp\_20090816.png  
\* nowet\_BC\_fp\_20090817.png  
\* nowet\_BC\_fp\_20090818.png  
\* nowet\_BC\_fp\_20090819.png  
\* nowet\_BC\_fp\_20090820.png  
\* nowet\_BC\_fp\_20090821.png  
\* nowet\_BC\_fp\_20090822.png  
\* nowet\_BC\_fp\_20090823.png  
\* nowet\_BC\_fp\_20090824.png  
\* nowet\_BC\_fp\_20090825.png  
\* nowet\_BC\_fp\_20090826.png  
\* nowet\_BC\_fp\_20090827.png  
\* nowet\_BC\_fp\_20090828.png  
\* nowet\_BC\_fp\_20090829.png  
\* nowet\_BC\_fp\_20090830.png  
\* nowet\_BC\_fp\_20090831.png  
\* nowet\_BC\_fp\_20090901.png  
\* nowet\_BC\_fp\_20090902.png  
\* nowet\_BC\_fp\_20090903.png  
\* nowet\_BC\_fp\_20090904.png  
\* nowet\_BC\_fp\_20090905.png  
\* nowet\_BC\_fp\_20090906.png

\* nowet\_BC\_fp\_20090907.png  
\* nowet\_BC\_fp\_20090908.png  
\* nowet\_BC\_fp\_20090909.png  
\* nowet\_BC\_fp\_20090910.png  
\* nowet\_BC\_fp\_20090911.png  
\* nowet\_BC\_fp\_20090912.png  
\* nowet\_BC\_fp\_20090913.png  
\* nowet\_BC\_fp\_20090914.png  
\* nowet\_BC\_fp\_20090915.png  
\* nowet\_BC\_fp\_20090916.png  
\* nowet\_BC\_fp\_20090917.png  
\* nowet\_BC\_fp\_20090918.png  
\* nowet\_BC\_fp\_20090919.png  
\* nowet\_BC\_fp\_20090920.png  
\* nowet\_BC\_fp\_20090921.png  
\* nowet\_BC\_fp\_20090922.png  
\* nowet\_BC\_fp\_20090923.png  
\* nowet\_BC\_fp\_20090924.png  
\* nowet\_BC\_fp\_20090925.png  
\* nowet\_BC\_fp\_20090926.png  
\* nowet\_BC\_fp\_20090927.png  
\* nowet\_BC\_fp\_20090928.png  
\* nowet\_BC\_fp\_20090929.png  
\* nowet\_BC\_fp\_20090930.png  
\* nowet\_BC\_fp\_20091001.png  
\* nowet\_BC\_fp\_20091002.png  
\* nowet\_BC\_fp\_20091003.png  
\* nowet\_BC\_fp\_20091004.png  
\* nowet\_BC\_fp\_20091005.png  
\* nowet\_BC\_fp\_20091006.png  
\* nowet\_BC\_fp\_20091007.png  
\* nowet\_BC\_fp\_20091008.png  
\* nowet\_BC\_fp\_20091009.png  
\* nowet\_BC\_fp\_20091010.png  
\* nowet\_BC\_fp\_20091011.png  
\* nowet\_BC\_fp\_20091012.png  
\* nowet\_BC\_fp\_20091013.png  
\* nowet\_BC\_fp\_20091014.png  
\* nowet\_BC\_fp\_20091015.png  
\* nowet\_BC\_fp\_20091016.png  
\* nowet\_BC\_fp\_20091017.png  
\* nowet\_BC\_fp\_20091018.png  
\* nowet\_BC\_fp\_20091019.png  
\* nowet\_BC\_fp\_20091020.png  
\* nowet\_BC\_fp\_20091021.png  
\* nowet\_BC\_fp\_20091022.png  
\* nowet\_BC\_fp\_20091023.png

- \* nowet\_BC\_fp\_20091024.png
- \* nowet\_BC\_fp\_20091025.png
- \* nowet\_BC\_fp\_20091026.png
- \* nowet\_BC\_fp\_20091027.png
- \* nowet\_BC\_fp\_20091028.png
- \* nowet\_BC\_fp\_20091029.png
- \* nowet\_BC\_fp\_20091030.png
- \* nowet\_BC\_fp\_20091031.png
- \* nowet\_BC\_fp\_20091101.png
- \* nowet\_BC\_fp\_20091102.png
- \* nowet\_BC\_fp\_20091103.png
- \* nowet\_BC\_fp\_20091104.png
- \* nowet\_BC\_fp\_20091105.png
- \* nowet\_BC\_fp\_20091106.png
- \* nowet\_BC\_fp\_20091107.png
- \* nowet\_BC\_fp\_20091108.png
- \* nowet\_BC\_fp\_20091109.png
- \* nowet\_BC\_fp\_20091110.png
- \* nowet\_BC\_fp\_20091111.png
- \* nowet\_BC\_fp\_20091112.png
- \* nowet\_BC\_fp\_20091113.png
- \* nowet\_BC\_fp\_20091114.png
- \* nowet\_BC\_fp\_20091115.png
- \* nowet\_BC\_fp\_20091116.png
- \* nowet\_BC\_fp\_20091117.png
- \* nowet\_BC\_fp\_20091118.png
- \* nowet\_BC\_fp\_20091119.png
- \* nowet\_BC\_fp\_20091120.png
- \* nowet\_BC\_fp\_20091121.png
- \* nowet\_BC\_fp\_20091122.png
- \* nowet\_BC\_fp\_20091123.png
- \* nowet\_BC\_fp\_20091124.png
- \* nowet\_BC\_fp\_20091125.png
- \* nowet\_BC\_fp\_20091126.png
- \* nowet\_BC\_fp\_20091127.png
- \* nowet\_BC\_fp\_20091128.png
- \* nowet\_BC\_fp\_20091129.png
- \* nowet\_BC\_fp\_20091130.png
- \* nowet\_BC\_fp\_20091201.png
- \* nowet\_BC\_fp\_20091202.png
- \* nowet\_BC\_fp\_20091203.png
- \* nowet\_BC\_fp\_20091204.png
- \* nowet\_BC\_fp\_20091205.png
- \* nowet\_BC\_fp\_20091206.png
- \* nowet\_BC\_fp\_20091207.png
- \* nowet\_BC\_fp\_20091208.png
- \* nowet\_BC\_fp\_20091209.png



- \* nowet\_BC\_fp\_20091210.png
- \* nowet\_BC\_fp\_20091211.png
- \* nowet\_BC\_fp\_20091212.png
- \* nowet\_BC\_fp\_20091213.png
- \* nowet\_BC\_fp\_20091214.png
- \* nowet\_BC\_fp\_20091215.png
- \* nowet\_BC\_fp\_20091216.png
- \* nowet\_BC\_fp\_20091217.png
- \* nowet\_BC\_fp\_20091218.png
- \* nowet\_BC\_fp\_20091219.png
- \* nowet\_BC\_fp\_20091220.png
- \* nowet\_BC\_fp\_20091221.png
- \* nowet\_BC\_fp\_20091222.png
- \* nowet\_BC\_fp\_20091223.png
- \* nowet\_BC\_fp\_20091224.png
- \* nowet\_BC\_fp\_20091225.png
- \* nowet\_BC\_fp\_20091226.png
- \* nowet\_BC\_fp\_20091227.png
- \* nowet\_BC\_fp\_20091228.png
- \* nowet\_BC\_fp\_20091229.png
- \* nowet\_BC\_fp\_20091230.png
- \* nowet\_BC\_fp\_20091231.png
- \* nowet\_east\_BC\_fp\_20091101.png
- \* nowet\_east\_BC\_fp\_20091102.png
- \* nowet\_east\_BC\_fp\_20091103.png
- \* nowet\_east\_BC\_fp\_20091104.png
- \* nowet\_east\_BC\_fp\_20091105.png
- \* nowet\_east\_BC\_fp\_20091106.png
- \* nowet\_east\_BC\_fp\_20091107.png
- \* nowet\_east\_BC\_fp\_20091108.png
- \* nowet\_east\_BC\_fp\_20091109.png
- \* nowet\_west\_BC\_fp\_20090601.png
- \* nowet\_west\_BC\_fp\_20090602.png
- \* nowet\_west\_BC\_fp\_20090603.png
- \* nowet\_west\_BC\_fp\_20090604.png
- \* nowet\_west\_BC\_fp\_20090605.png
- \* nowet\_west\_BC\_fp\_20090606.png
- \* nowet\_west\_BC\_fp\_20090607.png
- \* nowet\_west\_BC\_fp\_20090608.png
- \* nowet\_west\_BC\_fp\_20090609.png
- \* nowet\_west\_BC\_fp\_20090610.png
- \* nowet\_west\_BC\_fp\_20090611.png
- \* nowet\_west\_BC\_fp\_20090612.png
- \* nowet\_west\_BC\_fp\_20090613.png
- \* nowet\_west\_BC\_fp\_20090614.png
- \* nowet\_west\_BC\_fp\_20090615.png
- \* nowet\_west\_BC\_fp\_20090616.png

- \* nowet\_west\_BC\_fp\_20090617.png
- \* nowet\_west\_BC\_fp\_20090618.png
- \* nowet\_west\_BC\_fp\_20090619.png
- \* nowet\_west\_BC\_fp\_20090620.png
- \* nowet\_west\_BC\_fp\_20090621.png
- \* nowet\_west\_BC\_fp\_20090622.png
- \* nowet\_west\_BC\_fp\_20090623.png
- \* nowet\_west\_BC\_fp\_20090624.png
- \* nowet\_west\_BC\_fp\_20090625.png
- \* nowet\_west\_BC\_fp\_20090626.png
- \* nowet\_west\_BC\_fp\_20090627.png
- \* nowet\_west\_BC\_fp\_20090628.png
- \* nowet\_west\_BC\_fp\_20090629.png
- \* nowet\_west\_BC\_fp\_20090630.png
- rain\_trmm\_20111009.png
- rain\_trmm\_20111010.png
- rain\_trmm\_20111011.png
- rain\_trmm\_20111012.png
- rain\_trmm\_20111013.png
- rain\_trmm\_20111014.png
